# Supplementary material for: Eid-al-Fitr festivity and Ramadan fasting attitude among individuals with diabetes from Saudi Arabia and Pakistan: a cross-sectional study
Source: HighWire-hosted journal article supplement (doi:10.1136/bmjopen-2021-054902), 2022-09-01
Supplement: bmjopen-2021-054902supp001_data_supplement.pdf [file bmjopen-2021-054902supp001_data_supplement.pdf]

**Questionnaire****Eid-al-Fiter Festivity among Diabetics: Diabetic subjects' perspective**

Age=----- yrs Gender= Male/Female,

Diabetes type= Type 1/Type2 Duration of diabetes= &lt;5 yrs/5-10 yrs/11-15 yrs/&gt;15 yrs,

Body weight= ----- Kg Height=----- cm

| Statements                                                                                          | Yes | No |           |
|-----------------------------------------------------------------------------------------------------|-----|----|-----------|
| Do you have any first degree relative with diabetes?                                                |     |    |           |
| If yes:                                                                                             |     |    |           |
| Type 1 DM                                                                                           |     |    |           |
| Type 2 DM                                                                                           |     |    |           |
| Did you visit a doctor during recent Ramadan?                                                       |     |    |           |
| Did you visit a doctor before recent Ramadan?                                                       |     |    |           |
| <b>Experience during fasting recent Ramadan</b>                                                     |     |    |           |
| Did you break the fast a day or more because of diabetes?                                           |     |    |           |
| Did you observe hypoglycemia while fasting                                                          |     |    |           |
| Were you strictly adherent to your medications during Ramadan?                                      |     |    |           |
| How would you score comfort of fasting in Ramadan? 0-10 score                                       |     |    |           |
| Which Eid is this after becoming diabetic?                                                          |     |    |           |
| Was Eid-al-Fiter a special day for you?                                                             |     |    |           |
| Was your blood sugar level remained controlled during Ramazan?                                      | Yes | No | sometimes |
| Did you feel stressed or depressed on Eid day because of diabetes?                                  |     |    |           |
| Did you perform all activities on Eid day that you were used to perform before developing diabetes? |     |    |           |
| Did you feel that people had sympathy for you on Eid day?                                           |     |    |           |
| Did you feel that you have celebrated Eid just like other people without any constraint?            |     |    |           |

|                                                                                                                                 |     |    |  |
|---------------------------------------------------------------------------------------------------------------------------------|-----|----|--|
| Did you feel that on Eid day, your activities were restrictive because of diabetes?                                             |     |    |  |
| Did you feel that people had sympathy for you on Eid day?                                                                       |     |    |  |
| How do you evaluate yourself in diabetes monitoring, during Eid-ul-Fitr days? (score Not very disciplined 1-5 very disciplined) |     |    |  |
| <b>Consumption attitude</b>                                                                                                     |     |    |  |
| Are you using white sugar to tea or coffee on Eid-ul-fitr?                                                                      |     |    |  |
| Are you using brown sugars to tea for coffee on Eid-ul-fitr?                                                                    |     |    |  |
| Are you using artificial sweeteners for tea or coffee on Eid-ul-fitr?                                                           |     |    |  |
| Are you using consuming chocolates on Eid-ul-fitr?                                                                              |     |    |  |
| Are you using consuming sugary foods on Eid-ul-fitr?                                                                            |     |    |  |
| Are you using consuming candies and sweets on Eid-ul-fitr?                                                                      |     |    |  |
| Are you using consuming fatty foods on Eid-ul-fitr?                                                                             |     |    |  |
| Are you using consuming fruits on Eid-ul-fitr?                                                                                  |     |    |  |
| Are you using consuming vegetables on Eid-ul-fitr?                                                                              |     |    |  |
| Are you using consuming salty foods on Eid-ul-fitr?                                                                             |     |    |  |
| Are you using consuming fizzy drinks on Eid-ul-fitr?                                                                            |     |    |  |
| Are you using consuming canned juices on Eid-ul-fitr?                                                                           |     |    |  |
| Are you using consuming fresh juices on Eid-ul-fitr?                                                                            |     |    |  |
| <b>Diabetic complications</b>                                                                                                   |     |    |  |
| Do you have eye complications?                                                                                                  | Yes | No |  |
| Do you have kidney complications?                                                                                               |     |    |  |
| Do you have foot complications?                                                                                                 |     |    |  |
| Do you have heart complications?                                                                                                |     |    |  |
| <b>Treatments for DM</b>                                                                                                        |     |    |  |
| Are you using Tablets?                                                                                                          |     |    |  |

|                                                                                                                                                       |  |  |  |
|-------------------------------------------------------------------------------------------------------------------------------------------------------|--|--|--|
| Are you using Insulins?                                                                                                                               |  |  |  |
| Are you using both, Tablets and Insulins?                                                                                                             |  |  |  |
| Are you using medications for hypertension?                                                                                                           |  |  |  |
| Are you using hypolipidemic medications?                                                                                                              |  |  |  |
| Are you using medications for medications for gout?                                                                                                   |  |  |  |
| Are you using medications for heart diseases?                                                                                                         |  |  |  |
| Are you using vitamins B complex ?                                                                                                                    |  |  |  |
| <b>Measurements</b>                                                                                                                                   |  |  |  |
| What was your last fasting glucose ?(<5.6 mmol/L, 5.6-7 mmol/l, >7 mmol/l) (<100 mg/dl, 100-126mg/dl, >126 mg/dl)                                     |  |  |  |
| What was your last HbA1level ?(<6.5, >6.5)                                                                                                            |  |  |  |
| What was your last cholesterol result ?( <5.18 mmol/l, >5.18 mmol/l) (<200 mg/dl, >200 mg/dl)                                                         |  |  |  |
| What was your last triglycerides result ? (<1.7 mmol/l, >1.7 mmol/l) (<150 mg/dl, >150 mg/dl)                                                         |  |  |  |
| General Comments (Optional) :                                                                                                                         |  |  |  |
| If you are interested in more diabetes activities related to the initiative; Diabetes : Sustainable Care Model then pls rite your email ID (Optional) |  |  |  |
