# Supplementary material for: Eid-al-Fitr festivity and Ramadan fasting attitude among individuals with diabetes from Saudi Arabia and Pakistan: a cross-sectional study
Source: HighWire-hosted journal article supplement (doi:10.1136/bmjopen-2021-054902), 2022-09-01
Supplement: bmjopen-2021-054902supp002_data_supplement.pdf [file bmjopen-2021-054902supp002_data_supplement.pdf]

**Supplementary material****Table S1** Comparison of Saudi and Pakistani participants' sugar consumption attitude during Eid days (frequency, percentage, and p-value)

| attitude                                                               | Saudi |      | Pakistani |      | p-value |
|------------------------------------------------------------------------|-------|------|-----------|------|---------|
|                                                                        | N(%)  |      | N(%)      |      |         |
|                                                                        | n     | %    | n         | %    |         |
| Were you using white sugar to tea or coffee on Eid-ul-fitr?            |       |      |           |      |         |
| No                                                                     | 126   | 61.8 | 99        | 49.3 | 0.031   |
| Sometimes                                                              | 44    | 21.6 | 52        | 25.9 |         |
| Yes                                                                    | 34    | 16.7 | 50        | 24.9 |         |
| Were you using brown sugars to tea for coffee on Eid-ul-fitr?          |       |      |           |      |         |
| No                                                                     | 143   | 70.1 | 126       | 62.7 | .282    |
| Sometimes                                                              | 48    | 23.5 | 58        | 28.9 |         |
| Yes                                                                    | 13    | 6.4  | 17        | 8.5  |         |
| Were you using artificial sweeteners for tea or coffee on Eid-ul-fitr? |       |      |           |      |         |
| No                                                                     | 88    | 43.1 | 137       | 68.2 | <0.001  |
| Sometimes                                                              | 64    | 31.4 | 41        | 20.4 |         |
| Yes                                                                    | 52    | 25.5 | 23        | 11.4 |         |
| Were you using consuming chocolates on Eid-ul-fitr?                    |       |      |           |      |         |
| No                                                                     | 40    | 19.6 | 140       | 69.7 | <0.001  |
| Sometimes                                                              | 88    | 43.1 | 46        | 22.9 |         |
| Yes                                                                    | 76    | 37.3 | 15        | 7.5  |         |
| Were you using consuming sugary foods on Eid-ul-fitr?                  |       |      |           |      |         |
| No                                                                     | 52    | 25.5 | 101       | 50.2 | <0.001  |
| Sometimes                                                              | 101   | 49.5 | 51        | 25.4 |         |
| Yes                                                                    | 51    | 25.0 | 49        | 24.4 |         |
| Were you using consuming candies and sweets on Eid-ul-fitr?            |       |      |           |      |         |
| No                                                                     | 58    | 28.4 | 126       | 62.7 | <0.001  |
| Sometimes                                                              | 98    | 48.0 | 44        | 21.9 |         |
| Yes                                                                    | 48    | 23.5 | 31        | 15.4 |         |
| Were you using consuming fatty foods on Eid-ul-fitr?                   |       |      |           |      |         |
| No                                                                     | 61    | 29.9 | 79        | 39.3 | <0.001  |
| Sometimes                                                              | 91    | 44.6 | 49        | 24.4 |         |
| Yes                                                                    | 52    | 25.5 | 73        | 36.3 |         |
| Were you using consuming fruits on Eid-ul-fitr?                        |       |      |           |      |         |

|                                                        |     |      |     |      |        |
|--------------------------------------------------------|-----|------|-----|------|--------|
| No                                                     | 19  | 9.3  | 43  | 21.4 | <0.001 |
| Sometimes                                              | 72  | 35.3 | 28  | 13.9 |        |
| Yes                                                    | 113 | 55.4 | 130 | 64.7 |        |
| Were you using consuming vegetables on Eid-ul-fitr?    |     |      |     |      |        |
| No                                                     | 22  | 10.8 | 33  | 16.4 | 0.231  |
| Sometimes                                              | 37  | 18.1 | 31  | 15.4 |        |
| Yes                                                    | 145 | 71.1 | 137 | 68.2 |        |
| Were you using consuming salty foods on Eid-ul-fitr?   |     |      |     |      |        |
| No                                                     | 50  | 24.5 | 62  | 30.8 | 0.003  |
| Sometimes                                              | 89  | 43.6 | 55  | 27.4 |        |
| Yes                                                    | 65  | 31.9 | 84  | 41.8 |        |
| Were you using consuming fizzy drinks on Eid-ul-fitr?  |     |      |     |      |        |
| No                                                     | 126 | 61.8 | 117 | 58.2 | 0.384  |
| Sometimes                                              | 48  | 23.5 | 44  | 21.9 |        |
| Yes                                                    | 30  | 14.7 | 40  | 19.9 |        |
| Were you using consuming canned juices on Eid-ul-fitr? |     |      |     |      |        |
| No                                                     | 138 | 67.6 | 155 | 77.1 | 0.080  |
| Sometimes                                              | 46  | 22.5 | 29  | 14.4 |        |
| Yes                                                    | 20  | 9.8  | 17  | 8.5  |        |
| Were you using consuming fresh juices on Eid-ul-fitr?  |     |      |     |      |        |
| No                                                     | 71  | 34.8 | 120 | 59.7 | <0.001 |
| Sometimes                                              | 72  | 35.3 | 26  | 12.9 |        |
| Yes                                                    | 61  | 29.9 | 55  | 27.4 |        |
