# Supplementary material for: Eid-al-Fitr festivity and Ramadan fasting attitude among individuals with diabetes from Saudi Arabia and Pakistan: a cross-sectional study
Source: HighWire-hosted journal article supplement (doi:10.1136/bmjopen-2021-054902), 2022-09-01
Supplement: bmjopen-2021-054902supp003_data_supplement.pdf [file bmjopen-2021-054902supp003_data_supplement.pdf]

**Table S2** Comparison of Saudi and Pakistani participants' diabetic complications (frequency, percentage, and p-value)

| Complications | Saudi |      | Pakistani |      | P-value |
|---------------|-------|------|-----------|------|---------|
|               | n     | %    | n         | %    |         |
| <b>Eye</b>    |       |      |           |      |         |
| Don't Know    | 34    | 16.7 | 50        | 24.9 | 0.091   |
| No            | 124   | 60.8 | 116       | 57.7 |         |
| Yes           | 46    | 22.5 | 35        | 17.4 |         |
| <b>Kidney</b> |       |      |           |      |         |
| Don't Know    | 38    | 18.6 | 53        | 26.4 | 0.013   |
| No            | 143   | 70.1 | 139       | 69.2 |         |
| Yes           | 23    | 11.3 | 9         | 4.5  |         |
| <b>Foot</b>   |       |      |           |      |         |
| Don't Know    | 16    | 7.8  | 58        | 28.9 | <0.001  |
| No            | 153   | 75.0 | 129       | 64.2 |         |
| Yes           | 35    | 17.2 | 14        | 7.0  |         |
| <b>Heart</b>  |       |      |           |      |         |
| Don't Know    | 47    | 23.0 | 51        | 25.4 | 0.129   |
| No            | 136   | 66.7 | 140       | 69.7 |         |
| Yes           | 21    | 10.3 | 10        | 5.0  |         |
